# Supplementary material for: Analysis of Survival Benefits of Living Versus Deceased Donor Liver Transplant in High Model for End‐Stage Liver Disease and Hepatorenal Syndrome
Source: PubMed Central journal article supplement — Hepatology. 2021 May 4;73(6):2441–54. doi: 10.1002/hep.31584 (PMC8252626; doi:10.1002/hep.31584), 2021-05-04
Supplement: HEP-73-2441-s001.pdf [file HEP-73-2441-s001.pdf]

- 1 **Supplementary figure 1.** Intention-to-treat survival of patients who survived > 3 months
- 2 from listing.
- 3 **Supplementary figure 2A.** Intention-to-treat survival of patients with MELD >35.
- 4 **Supplementary figure 2B.** Intention-to-treat survival of patients with MELD >35 and HRS.
- 5 **Supplementary figure 3A.** Early patient survival of MELD >25 recipients.
- 6 **Supplementary figure 3B.** Early patient survival MELD >25 and HRS recipients.
- 7 **Supplementary figure 4A.** Graft survival of MELD >25 recipients after LDLT vs. DDLT.
- 8 **Supplementary figure 4B.** Graft survival of MELD >25 and HRS recipients after LDLT vs.
- 9 DDLT.
- 10 **Supplementary figure 5A.** Patient survival of MELD >35 recipients after LDLT vs. DDLT.
- 11 **Supplementary figure 5B.** Graft survival of MELD >35 recipients after LDLT vs. DDLT.
- 12 **Supplementary figure 6A.** eGFR of MELD >30 recipients after LDLT vs. DDLT. Data was
- 13 shown as median and interquartile range.
- 14 **Supplementary figure 6B.** eGFR of MELD >30 and HRS recipients after LDLT vs. DDLT. Data
- 15 was shown as median and interquartile range.
- 16 **Supplementary figure 6C.** eGFR of MELD >35 recipients after LDLT vs. DDLT. Data was
- 17 shown as median and interquartile range.
- 18 **Supplementary figure 6D.** eGFR of MELD >35 and HRS recipients after LDLT vs. DDLT. Data
- 19 was shown as median and interquartile range.
- 20

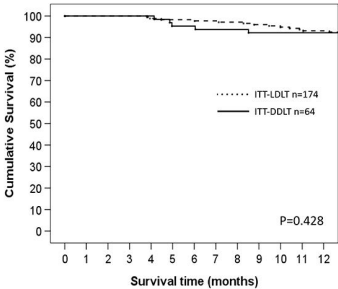

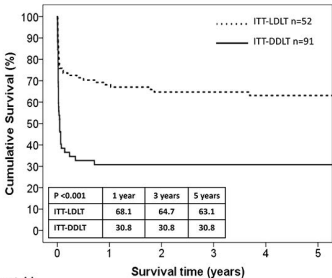

No. at risk

|          |    |      |    |      |      |      |
|----------|----|------|----|------|------|------|
| ITT-LDLT | 52 | 15.5 | 15 | 15   | 15   | 13.5 |
| ITT-DDLT | 91 | 60.5 | 51 | 42.5 | 37.5 | 35.5 |

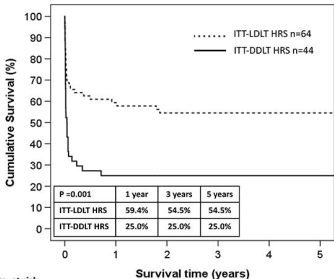

No. at risk

|              | 0  | 1    | 2  | 3  | 4  | 5  |
|--------------|----|------|----|----|----|----|
| ITT-LDLT HRS | 44 | 10.5 | 10 | 10 | 10 | 9  |
| ITT-DDLT HRS | 64 | 37   | 29 | 23 | 21 | 20 |

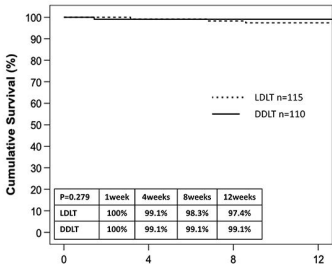

No. at risk

**Survival time (weeks)**

|      |     |     |     |     |     |
|------|-----|-----|-----|-----|-----|
| LDLT | 115 | 115 | 114 | 113 | 112 |
| DDLT | 110 | 110 | 109 | 109 | 109 |

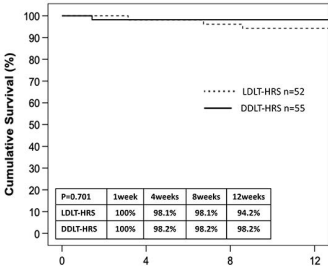

No. at risk

**Survival time (weeks)**

|          |    |    |    |    |    |
|----------|----|----|----|----|----|
| LDLT-HRS | 52 | 52 | 51 | 50 | 49 |
| DDLT-HRS | 55 | 55 | 54 | 54 | 54 |

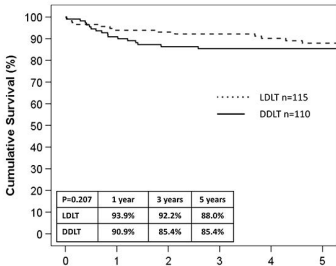

No. at risk

Survival time (years)

|      |     |     |     |      |    |      |
|------|-----|-----|-----|------|----|------|
| LDLT | 115 | 108 | 107 | 99   | 86 | 75   |
| DDLT | 110 | 100 | 95  | 83.5 | 70 | 66.5 |

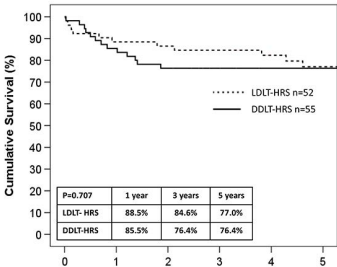

No. at risk

Survival time (years)

|          |    |    |    |      |    |    |
|----------|----|----|----|------|----|----|
| LDLT-HRS | 52 | 46 | 45 | 42   | 33 | 29 |
| DDLT-HRS | 55 | 47 | 42 | 36.5 | 34 | 33 |



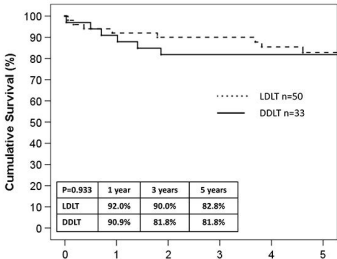

No. at risk

Survival time (years)

|      |    |    |    |      |    |    |
|------|----|----|----|------|----|----|
| LDLT | 50 | 46 | 45 | 44   | 35 | 31 |
| DDLT | 33 | 30 | 27 | 22.5 | 18 | 17 |

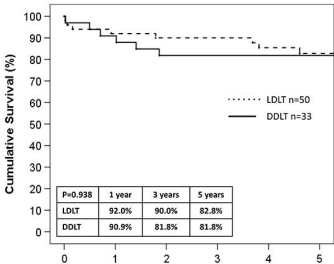

No. at risk

Survival time (years)

|      |    |    |    |      |    |    |
|------|----|----|----|------|----|----|
| LDLT | 50 | 46 | 45 | 44   | 35 | 31 |
| DDLT | 33 | 30 | 27 | 22.5 | 18 | 17 |

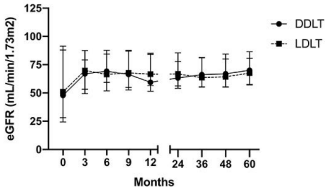

|         |       |       |       |       |       |       |       |       |       |
|---------|-------|-------|-------|-------|-------|-------|-------|-------|-------|
| DDLT    | 47.9  | 66.9  | 69.2  | 66.4  | 59.4  | 63.3  | 66.2  | 66.9  | 70.0  |
| LDLT    | 51.0  | 69.8  | 66.4  | 67.8  | 66.6  | 66.8  | 63.6  | 64.3  | 67.6  |
| P value | 0.891 | 0.617 | 0.538 | 0.984 | 0.449 | 0.200 | 0.976 | 0.949 | 0.446 |

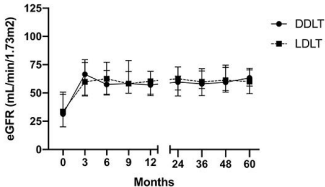

|         |       |       |       |       |       |       |       |       |       |
|---------|-------|-------|-------|-------|-------|-------|-------|-------|-------|
| DDLT    | 31.4  | 66.5  | 57.5  | 58.3  | 57.1  | 59.6  | 58.1  | 59.4  | 63.3  |
| LDLT    | 33.6  | 59.8  | 62.5  | 58.3  | 60.4  | 62.5  | 59.8  | 61.3  | 60.0  |
| P value | 0.920 | 0.680 | 0.723 | 0.478 | 0.566 | 0.597 | 0.924 | 0.733 | 0.726 |

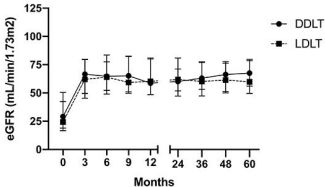

|         |       |       |       |      |       |       |       |       |       |
|---------|-------|-------|-------|------|-------|-------|-------|-------|-------|
| DDLT    | 29.1  | 66.6  | 64.7  | 65.2 | 58.7  | 60.2  | 63.1  | 66.3  | 67.5  |
| LDLT    | 24.3  | 62.0  | 64.0  | 59.3 | 60.3  | 61.9  | 60.2  | 61.4  | 59.8  |
| P value | 0.318 | 0.292 | 0.363 | 0.14 | 0.199 | 0.437 | 0.309 | 0.373 | 0.507 |

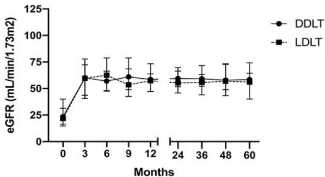

|         |       |       |       |       |       |       |       |       |       |
|---------|-------|-------|-------|-------|-------|-------|-------|-------|-------|
| DDLT    | 23.5  | 60.1  | 57.0  | 61.0  | 58.5  | 59.4  | 59.1  | 57.9  | 58.5  |
| LDLT    | 21.7  | 59.6  | 62.5  | 53.5  | 57.3  | 55.3  | 55.7  | 56.9  | 56.1  |
| P value | 0.517 | 0.257 | 0.159 | 0.054 | 0.085 | 0.406 | 0.239 | 0.389 | 0.147 |

Supplementary Table 1. Subgroup analysis of clinical characteristics of MELD >30 and MELD >35 at the time of listing for ITT-LDLT vs. ITT DDLT groups

|                                    | MELD >30 at listing |                  | P value | MELD >35 at listing |                 | P value |
|------------------------------------|---------------------|------------------|---------|---------------------|-----------------|---------|
|                                    | ITT DDLT (n=81)     | ITT-LDLT (n=168) |         | ITT DDLT (n=52)     | ITT-LDLT (n=91) |         |
| Age (years)                        | 55.6(34.6-72.5)     | 56.8(24.9-75.8)  | 0.645   | 54.8(34.7-71.9)     | 56.7(24.9-75.8) | 0.854   |
| Male: Female (n,%)                 | 70(86.4)            | 125(74.4)        | 0.031   | 44(84.6)            | 67(73.6)        | 0.129   |
| Recipient BMI (kg/m <sup>2</sup> ) | 24(17-33.4)         | 24.5(16.4-42.9)  | 0.927   | 24.3(17-31.8)       | 24.5(16.8-38.6) | 0.829   |
| Hepatitis B viral infection (n,%)  | 66(81.5)            | 136(81)          | 0.920   | 43(82.7)            | 71(78)          | 0.504   |
| Disease indication (n, %)          |                     |                  | 0.302   |                     |                 | 0.712   |
| • Acute liver failure              | 9(11.1)             | 19(11.3)         |         | 6(11.5)             | 12(13.2)        |         |
| • Acute on chronic liver failure   | 29(35.8)            | 82(48.8)         |         | 19(36.5)            | 42(46.2)        |         |
| • Decompensated cirrhosis          | 35(43.2)            | 54(32.1)         |         | 23(44.2)            | 28(30.8)        |         |
| • With concomitant HCC             | 6(7.4)              | 4(2.4)           |         | 3(5.8)              | 3(3.3)          |         |
| • Others                           | 2(2.5)              | 9(5.4)           |         | 1(1.9)              | 6(6.6)          |         |
| Biochemical data                   |                     |                  |         |                     |                 |         |
| • Bilirubin (umol/L)               | 495(80-1044)        | 444(61-949)      | 0.056   | 519.5(80-1044)      | 474(84-949)     | 0.176   |

|                                      |               |                 |        |                 |                 |        |
|--------------------------------------|---------------|-----------------|--------|-----------------|-----------------|--------|
| • INR                                | 3.1(1.7-8)    | 3.3(1.6-10)     | 0.486  | 3.8(1.7-8)      | 3.6(1.6-10)     | 0.945  |
| • Creatinine (umol/L)                | 182 (47-766)  | 145.5(39-1022)  | 0.015  | 225(47-766)     | 212(43-1022)    | 0.210  |
| • eGFR (ml/min/1.73m <sup>2</sup> )* | 33.8(5.8-138) | 43.1(4.3-136.2) | 0.030  | 26.9(5.8-138)   | 28.2(4.3-136.2) | 0.243  |
| MELD at listing                      | 37(30-51.2)   | 35.3(30-55)     | 0.149  | 39.8(35.2-51.2) | 39.7(35-55)     | 0.591  |
| HRS (n,%)                            | 61(75.3)      | 95(56.5)        | 0.040  | 44(84.6)        | 64(70.3)        | 0.056  |
| Waiting list outcome (n, %)          |               |                 | <0.001 |                 |                 | <0.001 |
| • Death/ Delist                      | 42(51.9)      | 36(21.4)        |        | 34(65.4)        | 24(26.4)        |        |
| • Transplant                         | 37(45.7)      | 129(76.8)       |        | 16(30.8)        | 67(73.6)        |        |
| • Active waiting                     | 0(0)          | 0(0)            |        | 0(0)            | 0(0)            |        |
| • Recovery                           | 2(2.5)        | 3(1.8)          |        | 2(3.8)          | 0(0)            |        |

BMI, body mass index; HCC, eGFR, estimated glomerular filtration rate; hepatocellular carcinoma; HRS, hepatorenal syndrome; ITT-LDLT, intention-to-treat living donor liver transplantation; ITT-DDLT, intention-to-treat deceased donor liver transplantation; MELD, Model of End-Stage Liver Disease.

\*eGFR was based on the Modification of Diet and Renal Disease (MDRD) equation.

Continuous variable is expressed as median (range).

Categorical variable is expressed as number of patients (percentage).



Supplementary Table 2. Subgroup analysis of clinical characteristics and perioperative outcomes MELD >30 and MELD >35 at the time of transplant between DDLT vs. LDLT groups.

|                                      | MELD >30 at transplant |                 |         | MELD >35 at transplant |                 |         |
|--------------------------------------|------------------------|-----------------|---------|------------------------|-----------------|---------|
|                                      | DDLT (n=67)            | LDLT (n=81)     | P value | DDLT (n=37)            | LDLT (n=40)     | P value |
| <b>At transplant</b>                 |                        |                 |         |                        |                 |         |
| Age (years)                          | 56.9(24.9-72.5)        | 58.4(25.5-75.8) | 0.247   | 57(24.9-69.8)          | 57.1(41.8-75.8) | 0.721   |
| Male: Female (n,%)                   | 56(83.6)               | 62(76.5)        | 0.289   | 31(83.8)               | 30(75)          | 0.343   |
| Recipient BMI (kg/m <sup>2</sup> )   | 24.5(18.4-36.6)        | 24.7(16.8-42.9) | 0.768   | 25.4(18.4-36.6)        | 25.5(16.8-36)   | 0.984   |
| Hepatitis B viral infection (n,%)    | 55(82.1)               | 64(79)          | 0.639   | 32(86.5)               | 33(82.5)        | 0.630   |
| <b>Biochemical data</b>              |                        |                 |         |                        |                 |         |
| • Bilirubin (umol/L)                 | 530(139-1017)          | 466(112-1022)   | 0.083   | 561(215-1017)          | 540(112-1022)   | 0.882   |
| • INR                                | 2.8(1.7-10.1)          | 3.1(1.6-5.3)    | 0.347   | 3.1(1.7-10.1)          | 3.1(1.7-5.3)    | 0.540   |
| • Creatinine (umol/L)                | 138(37-841)            | 129(46-512)     | 0.052   | 195(37-841)            | 234.5(46-512)   | 0.704   |
| • eGFR (ml/min/1.73m <sup>2</sup> )* | 47.9(5.6-138)          | 51(9.5-142.3)   | 0.076   | 29.1(5.6-138)          | 24.3(9.5-115.7) | 0.828   |
| MELD                                 | 35.5(30.2-49.8)        | 34.8(30.1-51.9) | 0.699   | 39.5(35.1-49.8)        | 40.3(35.1-51.9) | 0.691   |
| HRS (n,%)                            | 39(58.2)               | 44(54.3)        | 0.635   | 27(73)                 | 27(67.5)        | 0.600   |

|                                                                 |                 |                 |        |                |                 |        |
|-----------------------------------------------------------------|-----------------|-----------------|--------|----------------|-----------------|--------|
| HRS and required perioperative renal replacement therapy (n, %) | 7(10.4)         | 13(16)          | 0.218  | 7(18.9)        | 14(35)          | 0.113  |
| Duration of HRS (days)                                          | 6(1-92)         | 6(1-80)         | 0.931  | 5(1-92)        | 5(1-80)         | 0.760  |
| Pretransplant status (n, %)                                     |                 |                 | 0.583  |                |                 | 0.773  |
| Home                                                            | 1(1.5)          | 1(1.2)          |        | 0(0)           | 0(0)            |        |
| Hospitalized                                                    | 37(55.2)        | 38(46.9)        |        | 16(43.2)       | 16(40)          |        |
| ICU                                                             | 29(43.3)        | 42(51.9)        |        | 21(56.8)       | 24(60)          |        |
| • Liver failure only                                            | 11(37.9)        | 15(35.7)        | 0.792  | 6(28.6)        | 6(25)           | 0.934  |
| • Liver failure + 1 organ failure <sup>‡</sup>                  | 17(58.6)        | 25(59.5)        |        | 14(66.7)       | 18(75)          |        |
| • Liver failure + 2 organs failure <sup>‡</sup>                 | 1(3.4)          | 2(4.8)          |        | 1(4.8)         | 0(0)            |        |
| Waiting time (days)                                             | 3(0-71)         | 2(0-60)         | 0.241  | 1(0-71)        | 2.5(0-60)       | 0.350  |
| <b>Perioperative outcomes</b>                                   |                 |                 |        |                |                 |        |
| Graft weight (g)                                                | 1180(365-2180)  | 605(340-970)    | <0.001 | 1215(365-2180) | 645(455-915)    | <0.001 |
| GRWR (%)                                                        | 1.67(0.57-3.37) | 0.87(0.48-1.57) | <0.001 | 1.7(0.57-3.11) | 0.89(0.55-1.57) | <0.001 |
| Right lobe graft (n,%)                                          | -               | 79(97.5)        | -      | -              | 40(100)         | -      |
| Cold ischemic time (mins)                                       | 359(101-583)    | 102(55-183)     | <0.001 | 353(101-583)   | 104(59-154)     | <0.001 |

|                                   |               |               |        |               |                 |        |
|-----------------------------------|---------------|---------------|--------|---------------|-----------------|--------|
| Operative time (mins)             | 497(270-1111) | 685(435-1160) | <0.001 | 489(357-1111) | 706.5(455-1160) | <0.001 |
| Portal flow modulation (n,%)      | -             | 3(3.8)        | -      | -             | 1(2.5)          | -      |
| • Splenic artery ligation         |               | 1             |        |               | 0               |        |
| • Splenic artery embolization     |               | 1             |        |               | 1               |        |
| • Ligation of shunt/ varices      |               | 1             |        |               | 0               |        |
| ICU stay (days)                   | 4.5(2-20)     | 4(2-142)      | 0.808  | 5(2-20)       | 8(2-142)        | 0.103  |
| Hospital stay (days)              | 21(9-325)     | 22(9-354)     | 0.516  | 24(10-325)    | 26.5(9-354)     | 0.330  |
| Overall complication (n,%)        | 53(79.1)      | 47(58)        | 0.006  | 29(78.4)      | 25(62.5)        | 0.128  |
| Severe postop complication† (n,%) |               |               | 0.261  |               |                 | 0.133  |
| • 3a                              | 12(42.9)      | 11(50)        |        | 7(43.8)       | 8(47.1)         |        |
| • 3b                              | 10(35.7)      | 9(40.9)       |        | 4(25)         | 8(47.1)         |        |
| • 4a                              | 6(21.4)       | 1(4.5)        |        | 5(31.3)       | 1(5.9)          |        |
| • 4b                              | 0(0)          | 1(4.5)        |        | 0(0)          | 0(0)            |        |
| Specific complications (n,%)      |               |               |        |               |                 |        |
| • Hepatic artery thrombosis       | 1(1.5)        | 0(0)          | 0.270  | 1(2.7)        | 0(0)            | 0.295  |
| • Portal vein thrombosis          | 2(3.0)        | 0(0)          | 0.294  | 1(2.7)        | 0(0)            | 0.295  |

|                                                     |        |        |       |        |        |       |
|-----------------------------------------------------|--------|--------|-------|--------|--------|-------|
| • Hepatic vein/ IVC thrombosis                      | 2(3.0) | 1(1.2) | 0.538 | 1(2.7) | 1(2.5) | 0.367 |
| • Biliary complications                             | 4(6.0) | 7(8.6) | 0.537 | 2(5.4) | 4(10)  | 0.452 |
| Hospital mortality (n,%)                            | 1(1.5) | 4(4.9) | 0.248 | 1(2.7) | 3(7.5) | 0.343 |
| Need for long-term renal replacement therapy (n, %) | 2(3.0) | 5(6.2) | 0.363 | 2(5.4) | 3(7.5) | 0.709 |
| Listed or had renal transplant (n, %)               | -      | -      | -     | -      | -      | -     |

DDLT, deceased donor liver transplantation; eGFR, estimated glomerular filtration rate; GRWR, graft-to-recipient weight ratio; ICU, intensive care unit; IVC, inferior vena cava; LDLT, living donor liver transplantation.

† Clavien-Dindo classification

\*eGFR was based on the Modification of Diet and Renal Disease (MDRD) equation.

Continuous variable is expressed as median (range).

Categorical variable is expressed as number of patients (percentage).

Supplementary table 3. Univariate and multivariable analyses of prognostic factors on patient mortality and graft failure.

| Variables                | Patient mortality    |       |                     |       | Graft failure        |       |                      |       |
|--------------------------|----------------------|-------|---------------------|-------|----------------------|-------|----------------------|-------|
|                          | Univariate           | P     | Multivariable       | P     | Univariate           | P     | Multivariable        | P     |
|                          | HR 95% CI            | value | HR 95% CI           | value | HR 95% CI            | value | HR 95% CI            | value |
| Recipient age (n=225)    | 1.061 (1.018-1.106)  | 0.005 | 1.055 (1.013-1.098) | 0.008 | 1.061 (1.018-1.106)  | 0.005 | 1.054 (1.012-1.108)  | 0.011 |
| Recipient gender (n=225) |                      | 0.587 |                     |       |                      | 0.581 |                      |       |
| Female (n=49)            | Ref                  |       |                     |       | Ref                  |       |                      |       |
| Male (n=179)             | 1.248 (0.561-2.779)  |       |                     |       | 1.253 (0.563-2.789)  |       |                      |       |
| Recipient BMI (n=225)    | 0.921 (0.83-1.013)   | 0.092 |                     |       | 0.921 (0.837-1.041)  | 0.093 |                      |       |
| Disease etiology (n=225) |                      | 0.211 |                     |       |                      | 0.622 |                      |       |
| No HBV (n=53)            | Ref                  |       |                     |       | Ref                  |       |                      |       |
| HBV infection (n=172)    | 0.621 (0.294-1.312)  |       |                     |       | 0.622 (0.294-1.315)  |       |                      |       |
| MELD at LT (n=225)       | 1.064 (1.016-1.115)  | 0.009 | 1.056 (1.007-1.107) | 0.025 | 1.065 (1.016-1.116)  | 0.009 | 1.057 (1.008-1.108)  | 0.023 |
| HCC (n=225)              |                      |       |                     |       |                      | 0.006 |                      |       |
| No (n=212)               | Ref                  |       |                     |       | Ref                  |       |                      |       |
| Yes (n=13)               | 3.845 (1.473-10.038) | 0.006 | 3.830(1.422-10.315) | 0.008 | 3.834 (1.468-10.008) |       | 3.718 (1.376-10.046) | 0.010 |

|                                              |                     |       |                     |       |                     |       |                     |       |
|----------------------------------------------|---------------------|-------|---------------------|-------|---------------------|-------|---------------------|-------|
| Pre-LT at ICU (n=225)                        |                     |       |                     |       |                     | 0.305 |                     |       |
| No (n=135)                                   | Ref                 |       |                     |       | Ref                 |       |                     |       |
| Yes (n=90)                                   | 1.436 (0.717-2.876) | 0.307 |                     |       | 1.438 (0.718-2.879) |       |                     |       |
| Donor age (n=225)                            | 1.018 (0.995-1.043) | 0.131 |                     |       | 1.018 (0.994-1.043) | 0.133 |                     |       |
| Donor gender (n=225)                         |                     |       |                     |       |                     | 0.128 |                     |       |
| Female (n=106)                               | Ref                 |       |                     |       | Ref                 |       |                     |       |
| Male (n=119)                                 | 1.760 (0.848-3.650) | 0.129 |                     |       | 1.762 (0.849-3.655) |       |                     |       |
| Donor BMI (n=225)                            | 1.131 (1.002-1.276) | 0.046 | 1.145 (1.009-1.299) | 0.036 | 1.131 (1.002-1.277) | 0.046 | 1.146 (1.010-1.300) | 0.035 |
| Transplant type (n=225)                      |                     |       |                     |       |                     | 0.161 |                     |       |
| DDLT (n=110)                                 | Ref                 |       |                     |       | Ref                 |       |                     |       |
| LDLT (n=115)                                 | 0.603 (0.297-1.222) | 0.161 |                     |       | 0.604 (0.298-1.224) |       |                     |       |
| Cold ischaemic time<br>(n=225)               | 1.002 (0.999-1.004) | 0.178 |                     |       | 1.002 (0.999-1.004) | 0.179 |                     |       |
| Postoperative severe<br>complication (n=225) | 1.349 (1.102-1.652) | 0.004 | 1.286 (1.048-1.578) | 0.016 | 1.349 (1.102-1.652) | 0.004 | 1.285 (1.047-1.577) | 0.016 |

BMI, body mass index; HBV, hepatitis B virus; DDLT, deceased donor liver transplantation; HCC, hepatocellular carcinoma; ICU, intensive care unit; LDLT, living donor liver transplantation; MELD, Model of End-Stage Liver Disease.

### *Transplant operation*

In DDLT, total hepatectomy was followed by conventional implantation with end-to-end inferior vena cava (IVC) reconstruction. Piggy-back technique was not used. In LDLT, total hepatectomy was performed and recipient's IVC was preserved. For right lobe living donor graft in our center, it almost always included the middle hepatic vein (MHV). A venoplasty between the right hepatic vein and MHV was performed at bench to create a triangular venous orifice, that would be directly anastomosed to the recipient's IVC. In left lobe living donor graft, the common cuff between MHV and left hepatic vein was directly anastomosed to the recipient's IVC in a triangular manner.

### *Post-operative and immunosuppression protocol*

All patients would be cared in the ICU and transferred to general ward after stabilization and without the need for organ support. The immunosuppression protocol was identical after LDLT and DDLT. All patients received an induction agent(anti-interleukin 2 receptor antibody, Basiliximab) and calcineurin inhibitors(CNI)(tacrolimus/cyclosporine) and mycophenolate mofetil as maintenance. The latter would be discontinued 3 months after transplant. Mammalian target of rapamycin inhibitors(sirolimus/everolimus) were available since 2006 as CNI sparing agents and for HCC patients. Maintenance steroid was prescribed to patients who had autoimmune liver disease, history of rejection, or as a CNI sparing agent.

All living donors were followed-up weekly after discharge, until normalization of liver function and INR, and then seen every 3 months for the first year and every 6 months thereafter.
